# Supplementary material
Source: Springer Nature journal article supplement (https://www.springermedizin.de/resource/supplementary/13058_2009_2452_MOESM5_ESM.pdf/9701444)

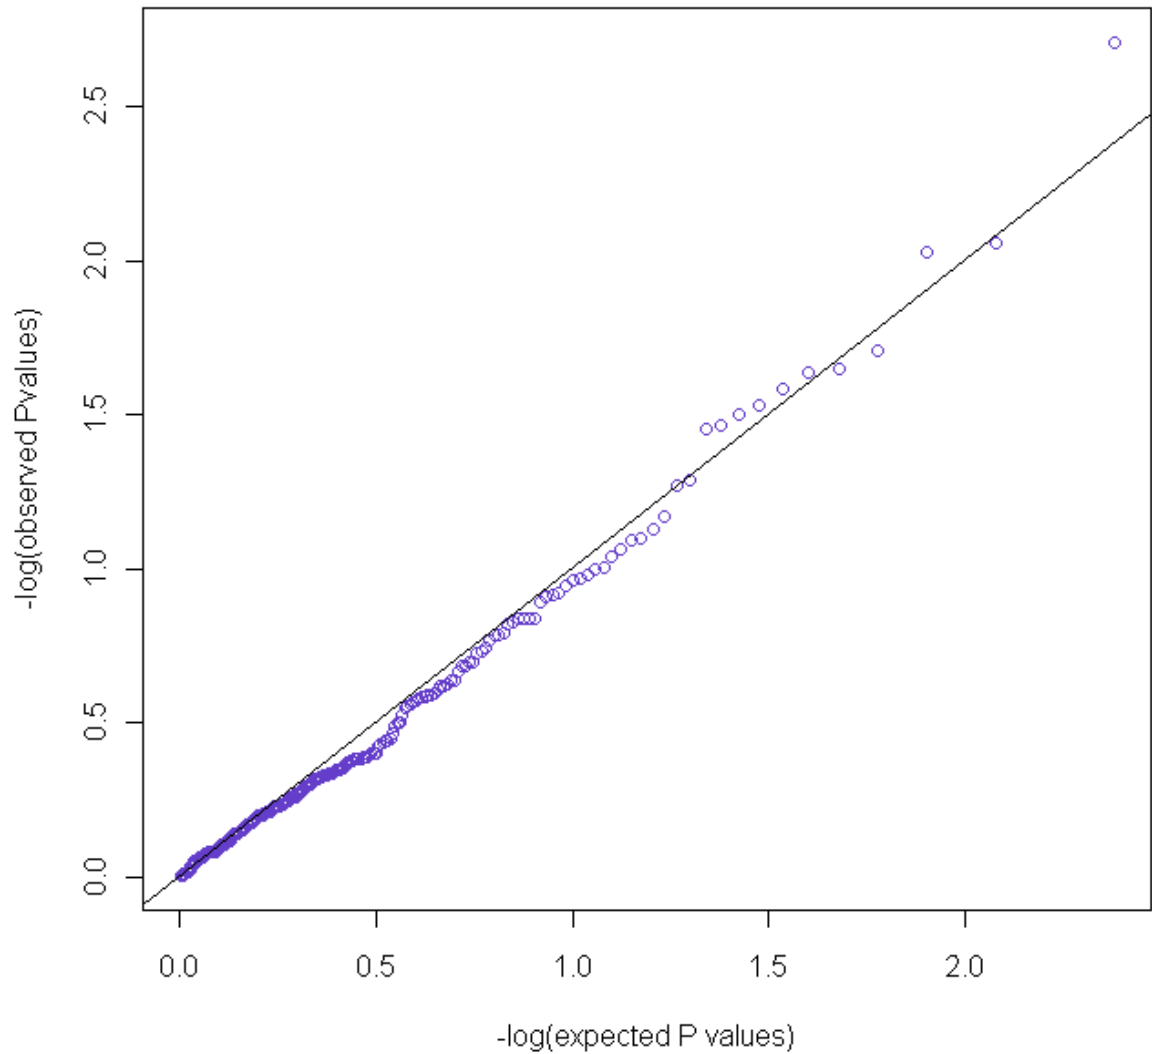

Supplement: MOESM5 [file 9701444]
